# Supplementary material for: Asymmetric nanoporous membranes for ethanol/water pervaporation separation and their design
Source: Royal Society of Chemistry journal article supplement (doi:10.1039/d3cp02271d), 2023-01-01
Supplement: d3cp02271d1.pdf [file d3cp02271d1.pdf]

*Supplementary Information*

*for*

Asymmetric Nanoporous Membranes for  
ethanol/water Pervaporation Separation and Their  
Design

Ting-Yuan Wang<sup>a</sup>, Changlong Zou<sup>b\*</sup>, Li-Chiang Lin<sup>a, b\*</sup>

<sup>a</sup>*Department of Chemical Engineering, National Taiwan University, No. 1, Sec. 4, Roosevelt Road,  
Taipei 10617, Taiwan*

<sup>b</sup>*William G. Lowrie Department of Chemical and Biomolecular Engineering, The Ohio State  
University, 151 W. Woodruff Avenue, Columbus, Ohio 43210, United States*

Changlong Zou \*E-mail: [zou.153@osu.edu](mailto:zou.153@osu.edu)

Li-Chiang Lin \*E-mail: [lclin@ntu.edu.tw](mailto:lclin@ntu.edu.tw)

## 1. Free Energy Calculation

The Helmholtz free energy profiles for ethanol molecules are calculated to shed light on the diffusion behavior of ethanol near the permeate-side surface. Provided that ethanol is a dominant phase in the system, their free energy profiles are computed directly from the concentration profiles along the z-axis. The calculation of free energy is based on Equation 1:

$$\Delta A = -k_b T \ln \frac{C_i(z)}{C_{i,ref}} \quad (1)$$

Where  $k_b$  is the Boltzmann constant, T is the temperature,  $C_i(z)$  is the ethanol concentration at a specific position, and  $C_{i,ref}$  denotes the maximum concentration of ethanol molecules along the z-axis.

**Table S1.** The results for the four types of membrane separation factor and thickness-normalized flux are presented per four independent calculations.

| Membrane type              | Separation factor<br>( $\alpha$ ) | Thickness normalized flux (Kg Å/m <sup>2</sup> h)<br>(J) |
|----------------------------|-----------------------------------|----------------------------------------------------------|
| MFI (random seed 1)        | 21.61                             | $6.24 \times 10^5$                                       |
| MFI (random seed 2)        | 27.68                             | $7.70 \times 10^5$                                       |
| MFI (random seed 3)        | 21.29                             | $7.04 \times 10^5$                                       |
| MFI (random seed 4)        | 23.69                             | $6.14 \times 10^5$                                       |
| Zigzag (random seed 1)     | 118.32                            | $8.76 \times 10^5$                                       |
| Zigzag (random seed 2)     | 85.83                             | $9.24 \times 10^5$                                       |
| Zigzag (random seed 3)     | 110.29                            | $9.43 \times 10^5$                                       |
| Zigzag (random seed 4)     | 115.28                            | $9.85 \times 10^5$                                       |
| Zigzag-MFI (random seed 1) | 268.14                            | $1.18 \times 10^6$                                       |
| Zigzag-MFI (random seed 2) | 645.21                            | $1.03 \times 10^6$                                       |
| Zigzag-MFI (random seed 3) | 176.11                            | $1.12 \times 10^6$                                       |
| Zigzag-MFI (random seed 4) | 204.60                            | $1.07 \times 10^6$                                       |
| MFI-Zigzag (random seed 1) | 29.58                             | $7.46 \times 10^5$                                       |
| MFI-Zigzag (random seed 2) | 36.18                             | $8.98 \times 10^5$                                       |
| MFI-Zigzag (random seed 3) | 21.96                             | $9.00 \times 10^5$                                       |
| MFI-Zigzag (random seed 4) | 25.68                             | $7.53 \times 10^5$                                       |

**Table S2.** Performance comparison between experiments and simulations. The simulation results obtained in this work are the averaged values of four independent simulations with different random seeds.

| Membrane type                                                   | separation factor<br>( $\alpha$ ) | Thickness normalized flux (Kg Å/m <sup>2</sup> h)<br>(J) | ref       |
|-----------------------------------------------------------------|-----------------------------------|----------------------------------------------------------|-----------|
| MFI/mullite tube                                                | 30-72                             | $8.00 \times 10^4$ - $2.26 \times 10^5$                  | 1         |
| MFI/YSZ fiber                                                   | 47                                | $2.22 \times 10^5$                                       | 2         |
| silicalite-1/ $\alpha$ - Al <sub>2</sub> O <sub>3</sub><br>tube | 23-45                             | $1.01 \times 10^5$ - $1.92 \times 10^5$                  | 3         |
| MFI (simulation)                                                | 20.17                             | $5.88 \times 10^5$                                       | 4, 5      |
| Zigzag (simulation)                                             | 136.00                            | $6.77 \times 10^5$                                       | 4, 5      |
| MFI                                                             | 23.57                             | $6.78 \times 10^5$                                       | This work |
| Zigzag                                                          | 107.43                            | $9.32 \times 10^5$                                       | This work |
| Zigzag-MFI                                                      | 323.52                            | $1.10 \times 10^6$                                       | This work |
| MFI-Zigzag                                                      | 28.35                             | $8.49 \times 10^5$                                       | This work |

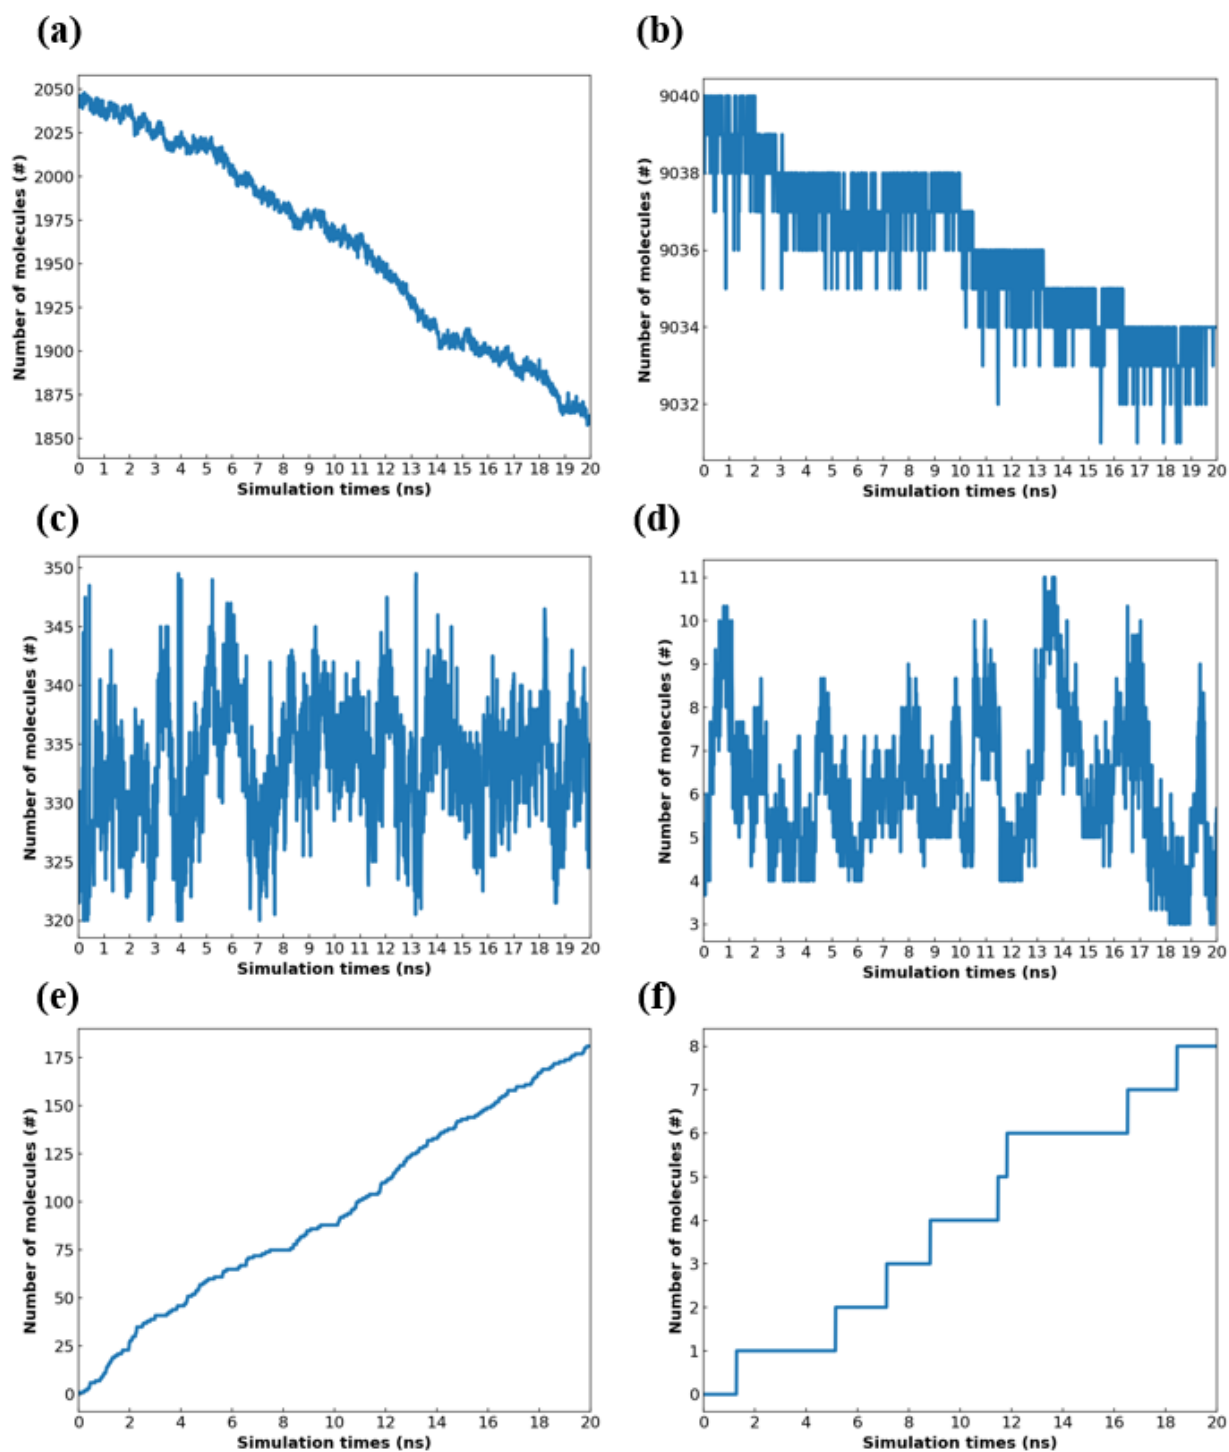

**Figure S1.** The number of (a) ethanol and (b) water molecules in the feed-side region, the number of (c) ethanol (d) water molecules within the membrane, the number of (e) ethanol and (f) water molecules on the adsorbing plate as a function of simulation time.

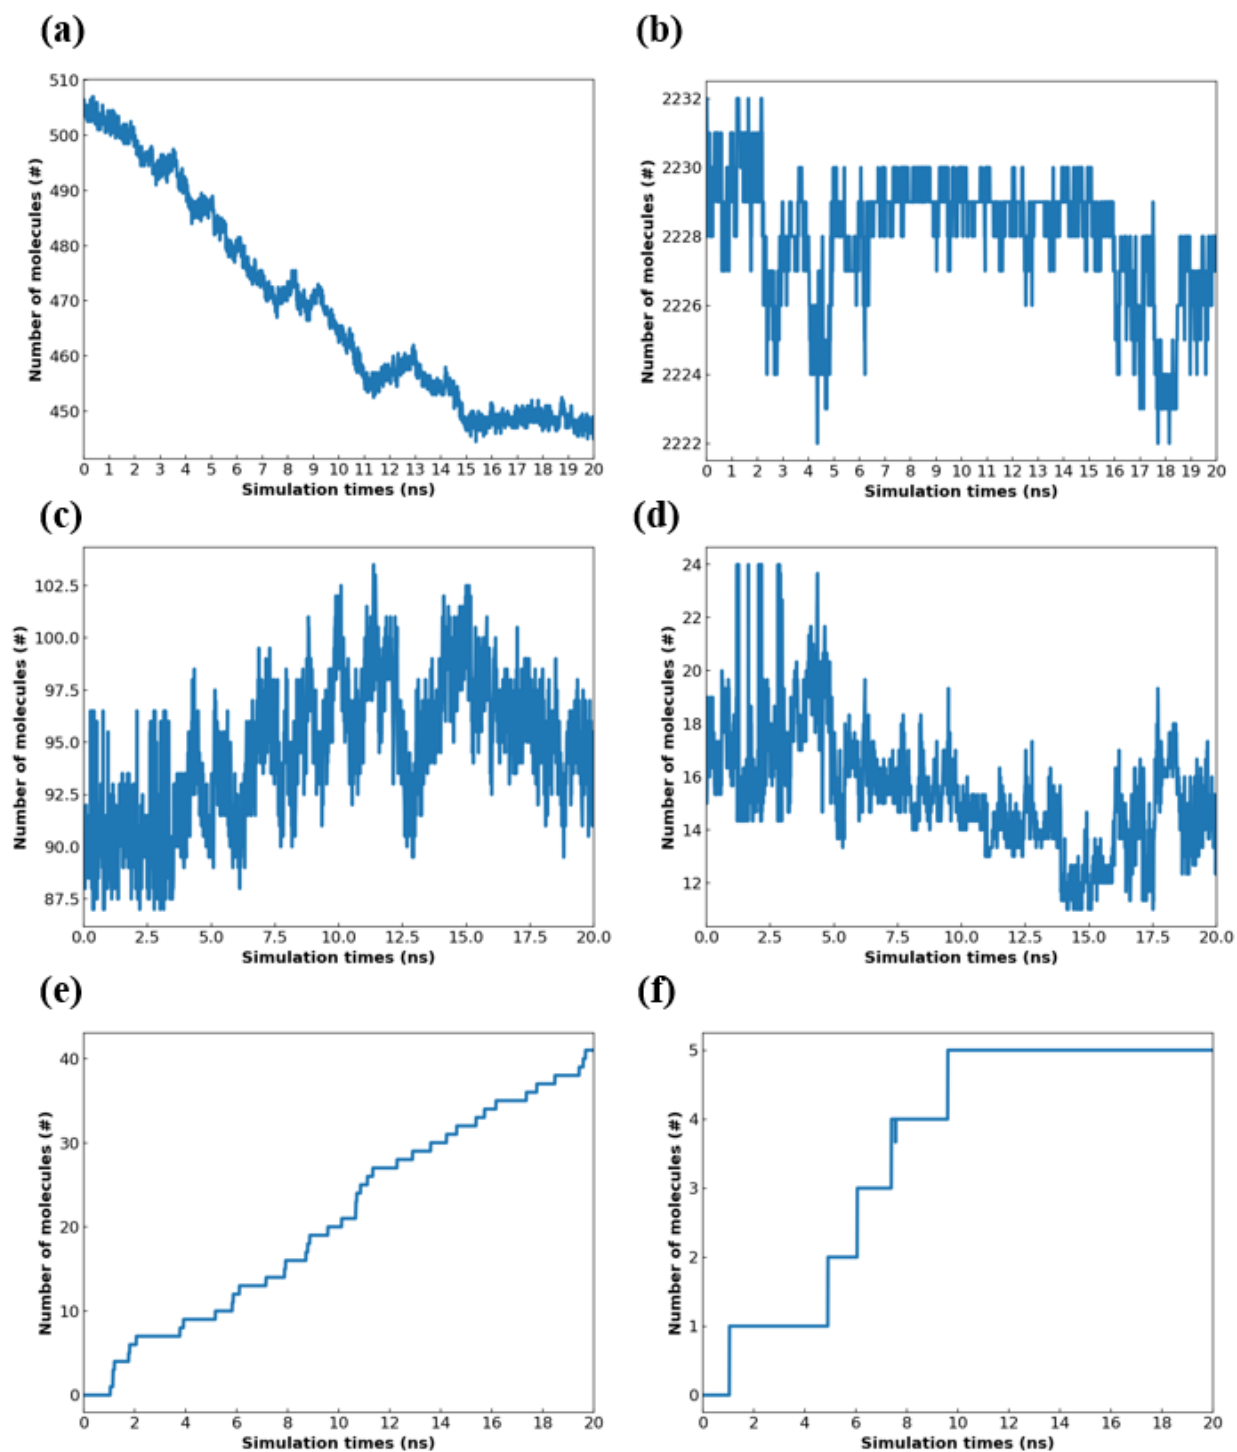

**Figure S2.** The number of (a) ethanol and (b) water molecules in the feed-side region, the number of (c) ethanol and (d) water molecules within the membrane, the number of (e) ethanol and (f) water molecules on the adsorbing plate as a function of simulation time observed in simulation of a smaller domain (i.e., 4-fold smaller than the simulation domain adopted to obtain all the reported main results in this work).

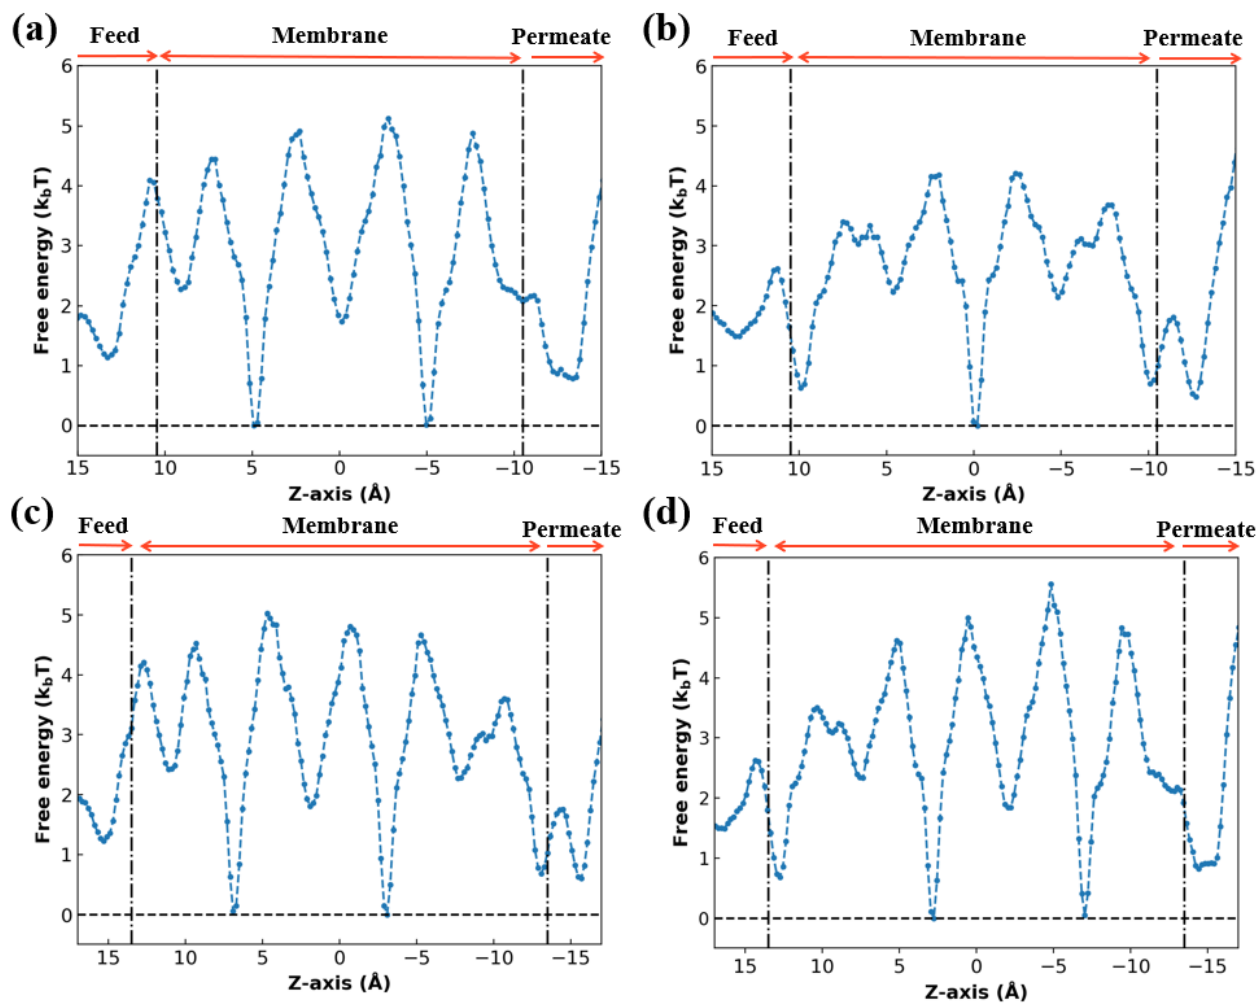

**Figure S3.** The free energy profiles along the permeation z-direction for ethanol in (a) MFI, (b) Zigzag, (c) MFI-Zigzag, and (d) Zigzag-MFI membranes.

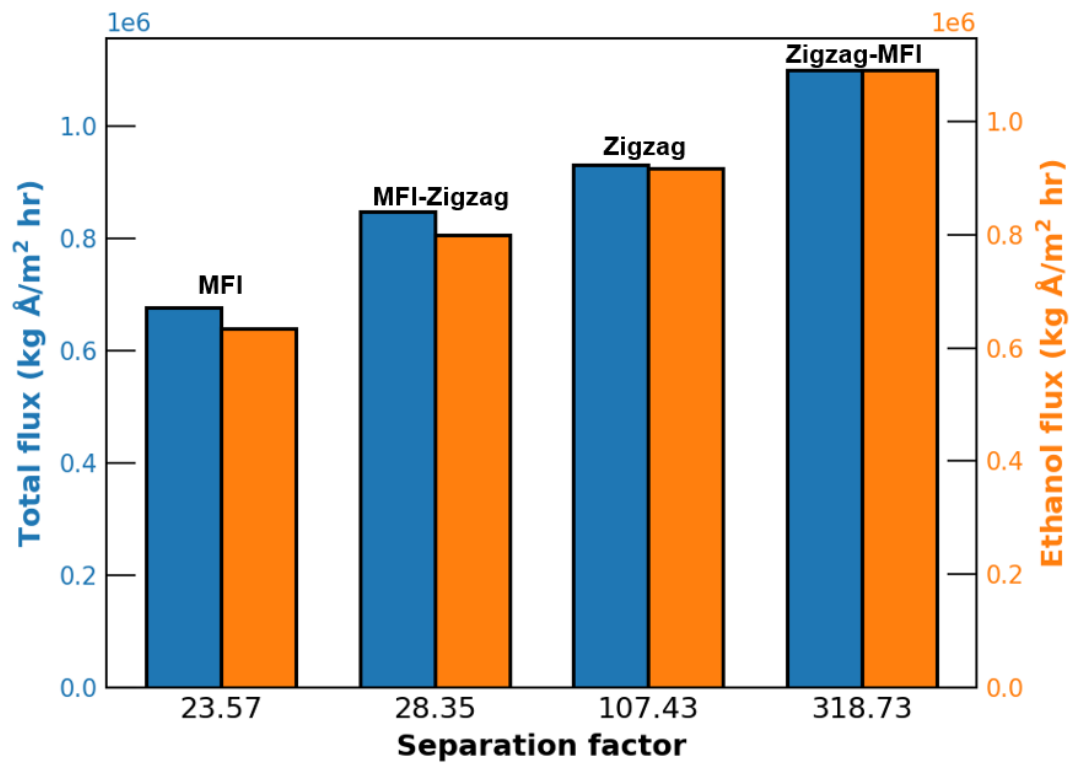

**Figure S4.** Total and ethanol flux with separation factors of the four studied membranes.



## References

1. X. Lin, H. Kita and K.-i. Okamoto, *Industrial & Engineering Chemistry Research*, 2001, **40**, 4069-4078.
2. X. Shu, X. Wang, Q. Kong, X. Gu and N. Xu, *Industrial & Engineering Chemistry Research*, 2012, **51**, 12073-12080.
3. D. Shen, W. Xiao, J. Yang, N. Chu, J. Lu, D. Yin and J. Wang, *Separation and Purification Technology*, 2011, **76**, 308-315.
4. C. Zou and L.-C. Lin, *Chemical Communications*, 2018, **54**, 13200-13203.
5. C. Zou and L.-C. Lin, *Industrial & Engineering Chemistry Research*, 2020, **59**, 12845-12854.
